# Supplementary material for: Gaultheria leucocarpa var. yunnanensis for Treating Rheumatoid Arthritis—An Assessment Combining Machine Learning–Guided ADME Properties Prediction, Network Pharmacology, and Pharmacological Assessment
Source: Front Pharmacol. 2021 Oct 4;12:704040. doi: 10.3389/fphar.2021.704040 (PMC8520986; doi:10.3389/fphar.2021.704040)
Supplement: Supplementary file 1 [file DataSheet3.xlsx]

## Sheet: Sheet1
Table S16 Detailed information of PPI network
#node1	node2	node1_string_id	node2_string_id	neighborhood_on_chromosome	gene_fusion	phylogenetic_cooccurrence	homology	coexpression	experimentally_determined_interaction	database_annotated	automated_textmining	combined_score
PPARG	RXRA	9606.ENSP00000287820	9606.ENSP00000419692	0	0	0	0.694	0.061	0.961	0.9	0.821	0.997
AKR1C1	AKR1C3	9606.ENSP00000370254	9606.ENSP00000369927	0	0	0.449	0.983	0.214	0.943	0.9	0.836	0.995
IL2	JAK3	9606.ENSP00000226730	9606.ENSP00000391676	0	0	0	0	0	0	0.9	0.824	0.981
JAK2	KIT	9606.ENSP00000371067	9606.ENSP00000288135	0	0	0	0.563	0	0.472	0.9	0.669	0.96
PPARA	RXRA	9606.ENSP00000385523	9606.ENSP00000419692	0	0	0	0.695	0.062	0.478	0.9	0.715	0.958
PPARD	RXRA	9606.ENSP00000310928	9606.ENSP00000419692	0	0	0	0.705	0.062	0.467	0.9	0.604	0.955
RXRA	VDR	9606.ENSP00000419692	9606.ENSP00000447173	0	0	0	0.635	0	0.438	0.9	0.677	0.955
IL2	SYK	9606.ENSP00000226730	9606.ENSP00000364907	0	0	0	0	0	0	0.9	0.559	0.954
IL2	JAK2	9606.ENSP00000226730	9606.ENSP00000371067	0	0	0	0	0	0	0.9	0.561	0.954
AKR1B1	DHFR	9606.ENSP00000285930	9606.ENSP00000396308	0	0	0	0	0	0	0.9	0.534	0.951
EGFR	RAC1	9606.ENSP00000275493	9606.ENSP00000348461	0	0	0	0	0	0.126	0.9	0.44	0.946
RAC1	SYK	9606.ENSP00000348461	9606.ENSP00000364907	0	0	0	0	0.064	0.16	0.9	0.381	0.944
NR3C1	NR3C2	9606.ENSP00000231509	9606.ENSP00000350815	0	0	0	0.861	0	0.379	0.9	0.942	0.943
IL2	MAPK14	9606.ENSP00000226730	9606.ENSP00000229795	0	0	0	0	0	0	0.9	0.44	0.941
MAPK14	RAC1	9606.ENSP00000229795	9606.ENSP00000348461	0	0	0	0	0.061	0.185	0.9	0.32	0.941
JAK2	NOS2	9606.ENSP00000371067	9606.ENSP00000327251	0	0	0	0	0	0.065	0.9	0.364	0.935
MAPK14	NR3C1	9606.ENSP00000229795	9606.ENSP00000231509	0	0	0	0	0	0.073	0.9	0.347	0.934
JAK2	JAK3	9606.ENSP00000371067	9606.ENSP00000391676	0	0	0	0.943	0	0.328	0.9	0.872	0.933
MAPK14	SYK	9606.ENSP00000229795	9606.ENSP00000364907	0	0	0	0.574	0.061	0.146	0.9	0.507	0.93
EGFR	JAK2	9606.ENSP00000275493	9606.ENSP00000371067	0	0	0	0.573	0	0.472	0.8	0.83	0.928
MAPK12	RAC1	9606.ENSP00000215659	9606.ENSP00000348461	0	0	0	0	0.061	0.185	0.9	0.17	0.927
KDR	RAC1	9606.ENSP00000263923	9606.ENSP00000348461	0	0	0	0	0	0.131	0.9	0.224	0.926
JAK3	SYK	9606.ENSP00000391676	9606.ENSP00000364907	0	0	0	0.646	0.088	0.064	0.9	0.552	0.924
NR3C1	RXRA	9606.ENSP00000231509	9606.ENSP00000419692	0	0	0	0.632	0	0	0.9	0.641	0.923
JAK3	MAPK14	9606.ENSP00000391676	9606.ENSP00000229795	0	0	0	0.597	0.062	0.146	0.9	0.306	0.922
NOS2	PPARA	9606.ENSP00000327251	9606.ENSP00000385523	0	0	0	0	0	0.091	0.9	0.211	0.922
KDR	MAPK14	9606.ENSP00000263923	9606.ENSP00000229795	0	0	0	0.579	0	0.084	0.9	0.442	0.921
MMP13	MMP9	9606.ENSP00000260302	9606.ENSP00000361405	0	0	0	0.797	0.064	0	0.9	0.878	0.919
NR1I2	RXRA	9606.ENSP00000336528	9606.ENSP00000419692	0	0	0	0.631	0.061	0.89	0	0.639	0.917
MAPK12	MAPK14	9606.ENSP00000215659	9606.ENSP00000229795	0	0	0.415	0.968	0.062	0.148	0.9	0.681	0.916
KIT	RAC1	9606.ENSP00000288135	9606.ENSP00000348461	0	0	0	0	0	0.08	0.9	0.144	0.914
PDPK1	RAC1	9606.ENSP00000344220	9606.ENSP00000348461	0	0	0	0	0.049	0	0.9	0.165	0.913
MMP13	MMP2	9606.ENSP00000260302	9606.ENSP00000219070	0	0	0	0.89	0.061	0	0.9	0.835	0.911
KDR	MAPK12	9606.ENSP00000263923	9606.ENSP00000215659	0	0	0	0.566	0	0.084	0.9	0.158	0.909
NOS2	RXRA	9606.ENSP00000327251	9606.ENSP00000419692	0	0	0	0	0	0.091	0.9	0.087	0.909
MMP2	MMP9	9606.ENSP00000219070	9606.ENSP00000361405	0	0	0	0.929	0.061	0	0.9	0.958	0.908
AKR1B1	AKR1C3	9606.ENSP00000285930	9606.ENSP00000369927	0	0	0.449	0.939	0	0	0.9	0.63	0.906
EGFR	JAK3	9606.ENSP00000275493	9606.ENSP00000391676	0	0	0	0.581	0	0.102	0.8	0.596	0.858
DHFR	DHODH	9606.ENSP00000396308	9606.ENSP00000219240	0	0	0	0	0.08	0	0	0.849	0.855
JAK2	KDR	9606.ENSP00000371067	9606.ENSP00000263923	0	0	0	0.559	0	0.096	0.8	0.54	0.854
ADAM17	EGFR	9606.ENSP00000309968	9606.ENSP00000275493	0	0	0	0	0.061	0	0	0.842	0.846
CYP2C8	CYP2C9	9606.ENSP00000360317	9606.ENSP00000260682	0	0	0.449	0.979	0.18	0	0.8	0.921	0.833
EGFR	MMP9	9606.ENSP00000275493	9606.ENSP00000361405	0	0	0	0	0	0	0	0.828	0.828
CYP2C9	GSTP1	9606.ENSP00000260682	9606.ENSP00000381607	0	0	0	0	0	0.077	0.65	0.5	0.824
ACE	NR3C2	9606.ENSP00000290866	9606.ENSP00000350815	0	0	0	0	0.062	0	0	0.807	0.811
EGFR	IL2	9606.ENSP00000275493	9606.ENSP00000226730	0	0	0	0	0	0	0.6	0.548	0.811
EGFR	MAPK14	9606.ENSP00000275493	9606.ENSP00000229795	0	0	0	0.577	0	0.723	0	0.751	0.81
AKR1B1	GLO1	9606.ENSP00000285930	9606.ENSP00000362463	0	0	0	0	0.172	0.42	0	0.634	0.809
CYP2C8	NR1I2	9606.ENSP00000360317	9606.ENSP00000336528	0	0	0	0	0.076	0.407	0	0.657	0.796
CYP2C8	GSTP1	9606.ENSP00000360317	9606.ENSP00000381607	0	0	0	0	0	0.077	0.65	0.399	0.789
EGFR	PPARG	9606.ENSP00000275493	9606.ENSP00000287820	0	0	0	0	0.062	0.402	0	0.65	0.787
CYP2C9	NR1I2	9606.ENSP00000260682	9606.ENSP00000336528	0	0	0	0	0.076	0.085	0	0.721	0.743
CASP1	SYK	9606.ENSP00000433138	9606.ENSP00000364907	0	0	0	0	0.138	0.396	0	0.525	0.731
MMP9	PPARG	9606.ENSP00000361405	9606.ENSP00000287820	0	0	0	0	0	0	0	0.709	0.709
MAPK14	MMP9	9606.ENSP00000229795	9606.ENSP00000361405	0	0	0	0	0.049	0	0	0.695	0.698
EGFR	MMP2	9606.ENSP00000275493	9606.ENSP00000219070	0	0	0	0	0.11	0	0	0.673	0.697
KDR	MMP9	9606.ENSP00000263923	9606.ENSP00000361405	0	0	0	0	0	0	0	0.677	0.677
CYP2C9	PLA2G2A	9606.ENSP00000260682	9606.ENSP00000383364	0	0	0	0	0.063	0	0.65	0.091	0.675
ADAM17	MAPK14	9606.ENSP00000309968	9606.ENSP00000229795	0	0	0	0	0	0	0	0.671	0.672
KDR	MMP2	9606.ENSP00000263923	9606.ENSP00000219070	0	0	0	0	0.098	0	0	0.648	0.668
MAPK14	MMP2	9606.ENSP00000229795	9606.ENSP00000219070	0	0	0	0	0.049	0	0	0.656	0.659
MMP2	PPARG	9606.ENSP00000219070	9606.ENSP00000287820	0	0	0	0	0.061	0	0	0.65	0.658
CYP2C8	PLA2G2A	9606.ENSP00000360317	9606.ENSP00000383364	0	0	0	0	0	0	0.65	0	0.65
AKR1B1	GSTP1	9606.ENSP00000285930	9606.ENSP00000381607	0	0	0	0	0.11	0	0	0.618	0.646
EGFR	NR3C1	9606.ENSP00000275493	9606.ENSP00000231509	0	0	0	0	0	0.415	0	0.414	0.643
EGFR	GSTP1	9606.ENSP00000275493	9606.ENSP00000381607	0	0	0	0	0.068	0.379	0	0.419	0.634
ADAM17	MMP9	9606.ENSP00000309968	9606.ENSP00000361405	0	0	0	0	0	0	0	0.617	0.617
MMP12	MMP9	9606.ENSP00000458585	9606.ENSP00000361405	0	0	0	0.732	0.506	0	0	0.816	0.613
ACE	MMP9	9606.ENSP00000290866	9606.ENSP00000361405	0	0	0	0	0.081	0	0	0.591	0.608
MAPK14	MMP13	9606.ENSP00000229795	9606.ENSP00000260302	0	0	0	0	0.049	0	0	0.6	0.603
EGFR	MMP13	9606.ENSP00000275493	9606.ENSP00000260302	0	0	0	0	0	0	0	0.6	0.601
MAPK14	PPARG	9606.ENSP00000229795	9606.ENSP00000287820	0	0	0	0	0	0.073	0	0.573	0.588
IL2	KIT	9606.ENSP00000226730	9606.ENSP00000288135	0	0	0	0	0	0	0	0.582	0.582
ADAM17	MMP2	9606.ENSP00000309968	9606.ENSP00000219070	0	0	0	0	0	0	0	0.574	0.574
ACE	ADAM17	9606.ENSP00000290866	9606.ENSP00000309968	0	0	0	0	0	0	0	0.569	0.569
CASP1	MAPK14	9606.ENSP00000433138	9606.ENSP00000229795	0	0	0	0	0	0.261	0	0.436	0.565
ACE	MMP2	9606.ENSP00000290866	9606.ENSP00000219070	0	0	0	0	0.061	0	0	0.553	0.563
ACE	PPARG	9606.ENSP00000290866	9606.ENSP00000287820	0	0	0	0	0.061	0	0	0.554	0.563
IL2	MMP9	9606.ENSP00000226730	9606.ENSP00000361405	0	0	0	0	0	0	0	0.556	0.556
JAK3	NOS2	9606.ENSP00000391676	9606.ENSP00000327251	0	0	0	0	0.062	0.065	0	0.518	0.54
ACE	AKR1B1	9606.ENSP00000290866	9606.ENSP00000285930	0	0	0	0	0	0	0	0.539	0.539
NR3C1	PPARG	9606.ENSP00000231509	9606.ENSP00000287820	0	0	0	0.578	0.06	0.379	0	0.595	0.539
CASP1	EGFR	9606.ENSP00000433138	9606.ENSP00000275493	0	0	0	0	0	0.384	0	0.276	0.536
MMP9	NOS2	9606.ENSP00000361405	9606.ENSP00000327251	0	0	0	0	0.064	0	0	0.519	0.53
EGFR	KDR	9606.ENSP00000275493	9606.ENSP00000263923	0	0	0	0.559	0.074	0.177	0	0.914	0.525
C1S	CA2	9606.ENSP00000385035	9606.ENSP00000285379	0	0	0	0	0	0	0	0.517	0.517
JAK3	KIT	9606.ENSP00000391676	9606.ENSP00000288135	0	0	0	0.568	0	0.379	0	0.526	0.514
ACE	VDR	9606.ENSP00000290866	9606.ENSP00000447173	0	0	0	0	0	0	0	0.511	0.511
KIT	MMP9	9606.ENSP00000288135	9606.ENSP00000361405	0	0	0	0	0	0	0	0.511	0.511
CASP1	IL2	9606.ENSP00000433138	9606.ENSP00000226730	0	0	0	0	0	0	0	0.507	0.507
MAPK14	NOS2	9606.ENSP00000229795	9606.ENSP00000327251	0	0	0	0	0.05	0	0	0.5	0.505
ACE	KDR	9606.ENSP00000290866	9606.ENSP00000263923	0	0	0	0	0.061	0	0	0.494	0.504
CASP1	MMP9	9606.ENSP00000433138	9606.ENSP00000361405	0	0	0	0	0.117	0	0	0.46	0.503
DHFR	METAP2	9606.ENSP00000396308	9606.ENSP00000325312	0.044	0	0	0	0.091	0	0	0.462	0.491
HPRT1	IL2	9606.ENSP00000298556	9606.ENSP00000226730	0	0	0	0	0	0	0	0.491	0.491
CYP2C8	RXRA	9606.ENSP00000360317	9606.ENSP00000419692	0	0	0	0	0	0.407	0	0.175	0.49
DHODH	HPRT1	9606.ENSP00000219240	9606.ENSP00000298556	0	0	0	0	0.057	0	0	0.481	0.49
CASP1	KDR	9606.ENSP00000433138	9606.ENSP00000263923	0	0	0	0	0.061	0	0	0.474	0.486
IL2	NOS2	9606.ENSP00000226730	9606.ENSP00000327251	0	0	0	0	0	0	0	0.486	0.486
ADAM17	KDR	9606.ENSP00000309968	9606.ENSP00000263923	0	0	0	0	0.061	0	0	0.473	0.483
JAK2	MMP9	9606.ENSP00000371067	9606.ENSP00000361405	0	0	0	0	0	0	0	0.482	0.482
PPARG	VDR	9606.ENSP00000287820	9606.ENSP00000447173	0	0	0	0.684	0	0.379	0	0.52	0.477
ACE	IL2	9606.ENSP00000290866	9606.ENSP00000226730	0	0	0	0	0	0	0	0.473	0.473
IL2	NR3C1	9606.ENSP00000226730	9606.ENSP00000231509	0	0	0	0	0	0	0	0.473	0.473
IL2	KDR	9606.ENSP00000226730	9606.ENSP00000263923	0	0	0	0	0	0	0	0.473	0.473
CASP1	NOS2	9606.ENSP00000433138	9606.ENSP00000327251	0	0	0	0	0.061	0	0	0.452	0.464
ADAM17	MMP13	9606.ENSP00000309968	9606.ENSP00000260302	0	0	0	0	0	0	0	0.463	0.463
ADAM17	MMP12	9606.ENSP00000309968	9606.ENSP00000458585	0	0	0	0	0	0	0	0.459	0.459
KDR	PPARA	9606.ENSP00000263923	9606.ENSP00000385523	0	0	0	0	0	0.051	0	0.454	0.459
NOS2	PPARG	9606.ENSP00000327251	9606.ENSP00000287820	0	0	0	0	0.062	0.091	0	0.417	0.459
DHFR	EGFR	9606.ENSP00000396308	9606.ENSP00000275493	0	0	0	0	0	0.099	0	0.42	0.455
IL2	MMP2	9606.ENSP00000226730	9606.ENSP00000219070	0	0	0	0	0	0	0	0.44	0.44
EGFR	VDR	9606.ENSP00000275493	9606.ENSP00000447173	0	0	0	0	0.062	0.077	0	0.398	0.433
ADAM17	PDPK1	9606.ENSP00000309968	9606.ENSP00000344220	0	0	0	0	0	0.379	0	0.124	0.432
IL2	VDR	9606.ENSP00000226730	9606.ENSP00000447173	0	0	0	0	0	0	0	0.428	0.428
AKR1B1	EGFR	9606.ENSP00000285930	9606.ENSP00000275493	0	0	0	0	0.231	0	0	0.285	0.426
JAK2	MMP2	9606.ENSP00000371067	9606.ENSP00000219070	0	0	0	0	0	0	0	0.421	0.42
DHFR	HPRT1	9606.ENSP00000396308	9606.ENSP00000298556	0.046	0	0	0	0.081	0	0	0.39	0.419
CA2	MMP9	9606.ENSP00000285379	9606.ENSP00000361405	0	0	0	0	0	0	0	0.414	0.414
ACE	CYP2C9	9606.ENSP00000290866	9606.ENSP00000260682	0	0	0	0	0	0.05	0	0.407	0.413
KIT	MMP2	9606.ENSP00000288135	9606.ENSP00000219070	0	0	0	0	0	0	0	0.408	0.408
ACE	NOS2	9606.ENSP00000290866	9606.ENSP00000327251	0	0	0	0	0.062	0	0	0.394	0.407
GP1BA	KIT	9606.ENSP00000329380	9606.ENSP00000288135	0	0	0	0	0	0.125	0	0.35	0.406
HPRT1	KIT	9606.ENSP00000298556	9606.ENSP00000288135	0	0	0	0	0	0	0	0.405	0.405
